# Supplementary material for: Effect of Maturity Stage on Cereal and Leguminous Seeds’ Metabolome as Analyzed Using Gas Chromatography Mass-Spectrometry (GC-MS) and Chemometric Tools
Source: MDPI journal article supplement (doi:10.3390/metabo13020163), 2023-01-23
Supplement: s1 [file s1]

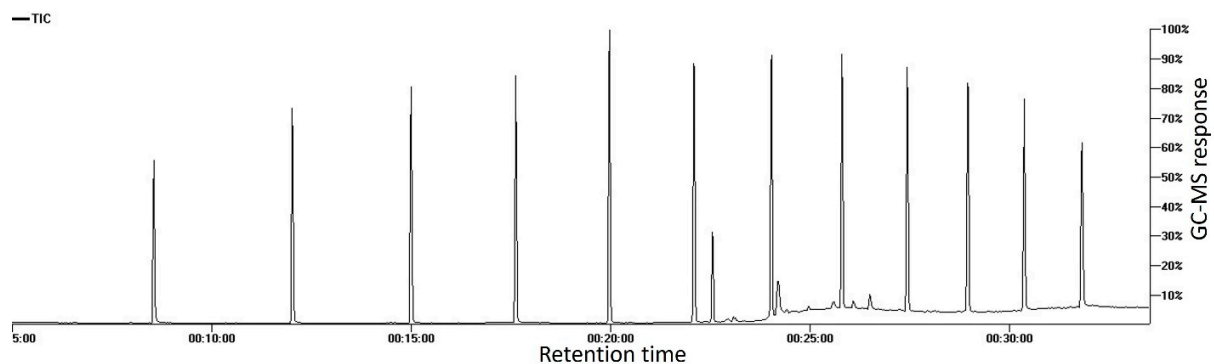

**Figure S1.** GC/MS chromatogram of the n-alkanes series (C20-C40) according to their retention indices (RI).

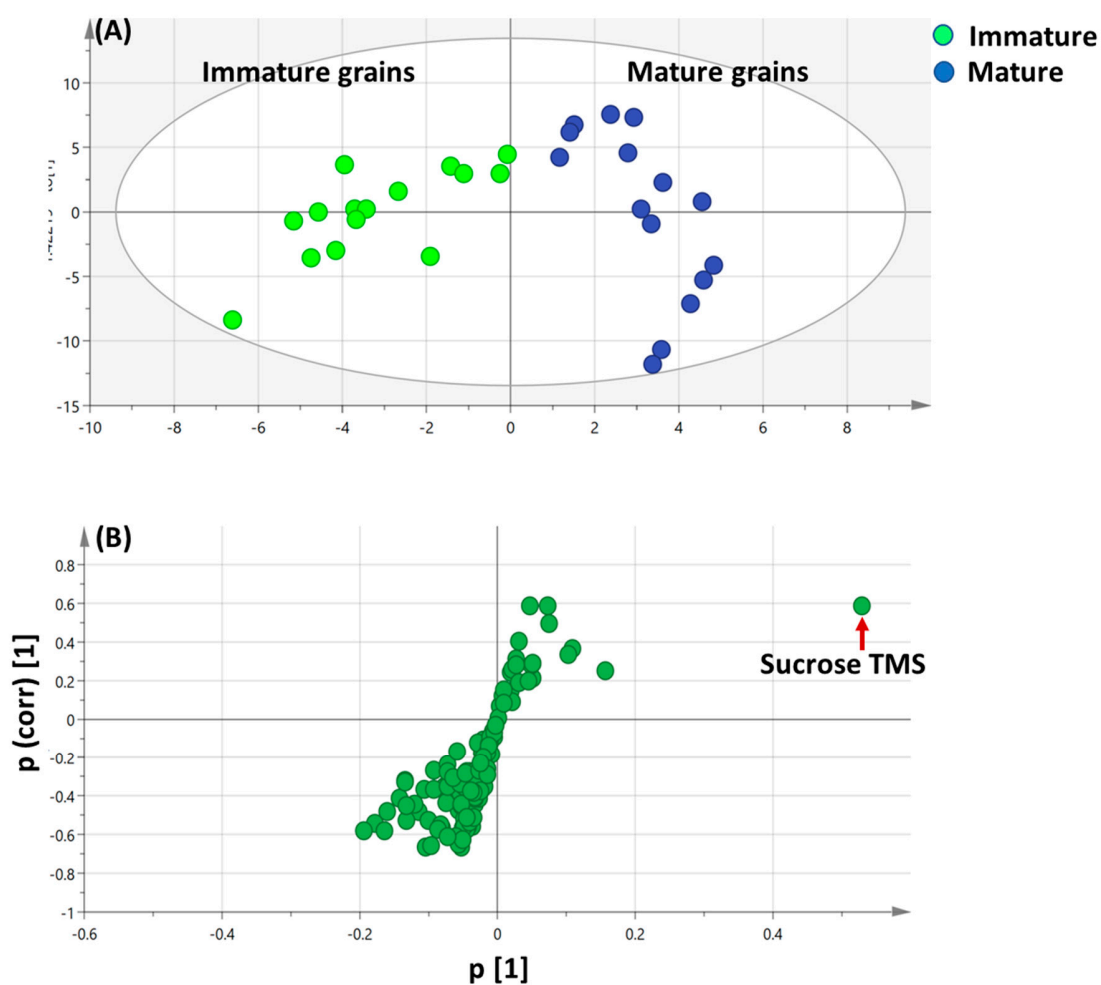

**Figure S2.** GC/MS dataset based OPLS-DA score plot (A) derived from modelling silylated primary metabolites of all mature samples against all immature ones ( $n = 3$ ). The respective loading S-plots (B) shows the covariance  $p[1]$  against the correlation  $p(\text{cor})[1]$  of the variables of the discriminating component of the OPLS-DA model. Cut-off values of  $p = 0.001$  was used. Designated variables are highlighted and identifications are discussed in the text.

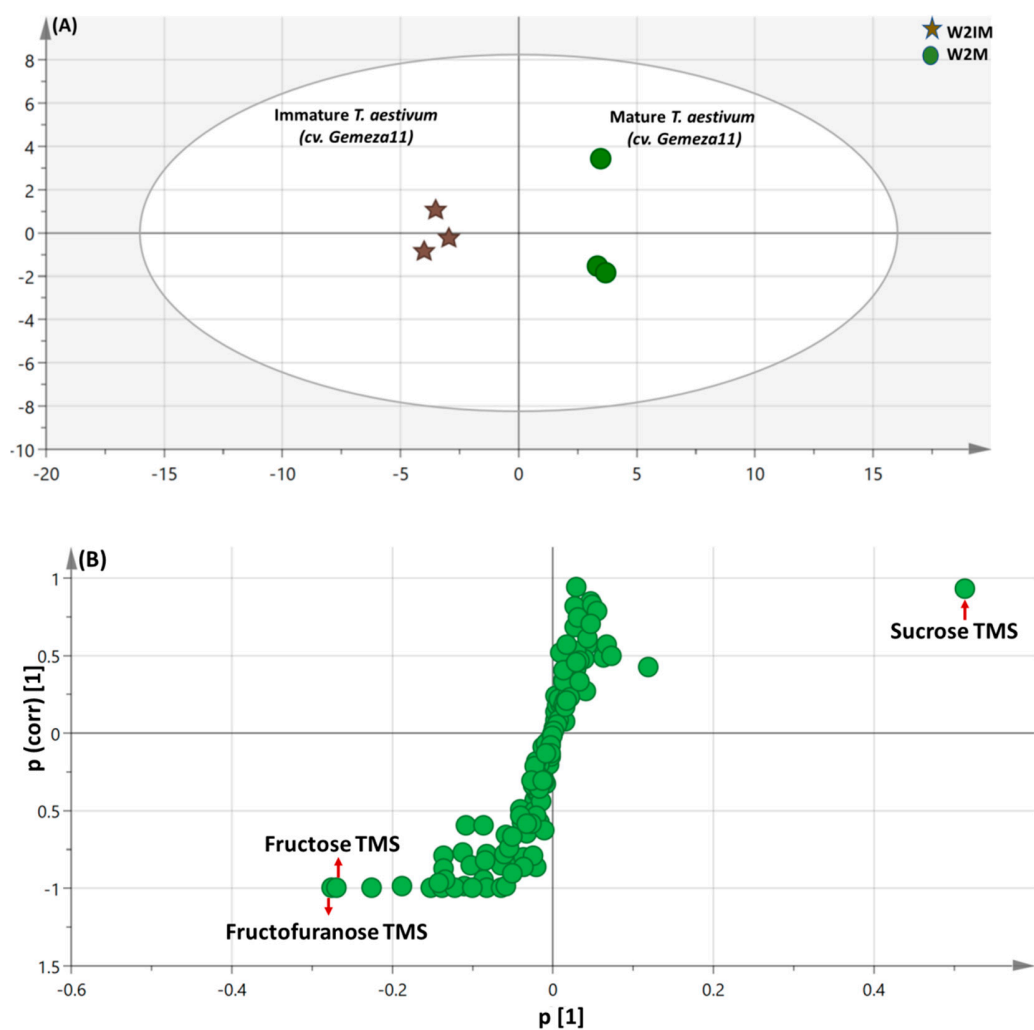

**Figure S3.** GC/MS based OPLS-DA score plot (A) derived from modelling silylated primary metabolites of mature vs. immature *T. aestivum* (cv. Gemeza 11) specimens ( $n = 3$ ). The respective loading S-plots (B) shows the covariance  $p[1]$  against the correlation  $p(\text{corr})[1]$  of the variables of the discriminating component of the OPLS-DA model. Cut-off values of  $p = 0.09$  was used. Designated variables are highlighted and identifications are discussed in the text.

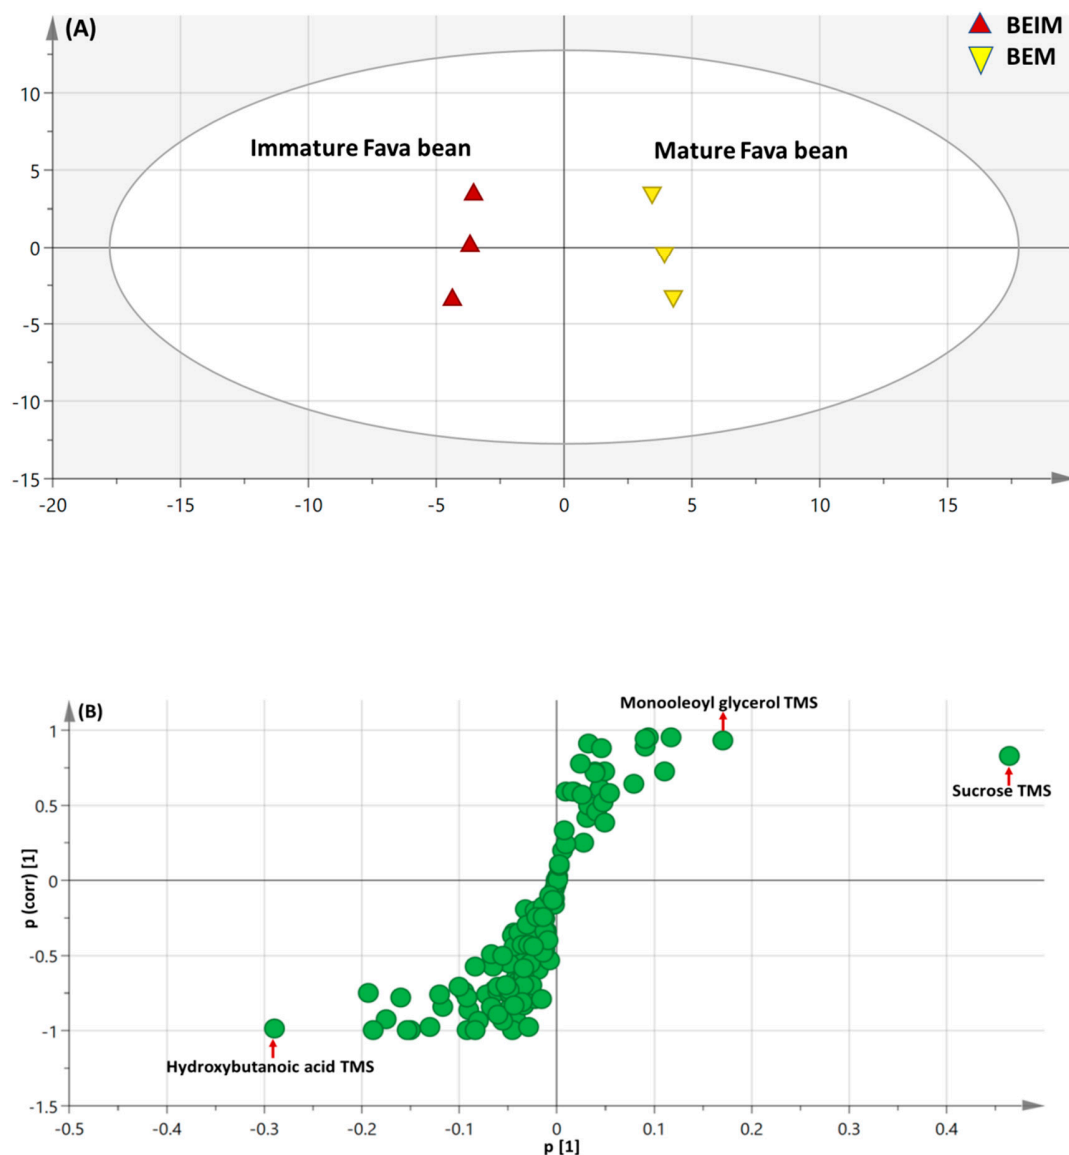

**Figure S4.** GC/MS based OPLS-DA score plot (A) derived from modelling silylated primary metabolites of mature vs. immature *V. faba* (cv. *Sakha 3*) specimens ( $n = 3$ ). The respective loading S-plots (B) shows the covariance  $p[1]$  against the correlation  $p(\text{corr})[1]$  of the variables of the discriminating component of the OPLS-DA model. Cut-off values of  $p = 0.06$  was used. Designated variables are highlighted and identifications are discussed in the text.

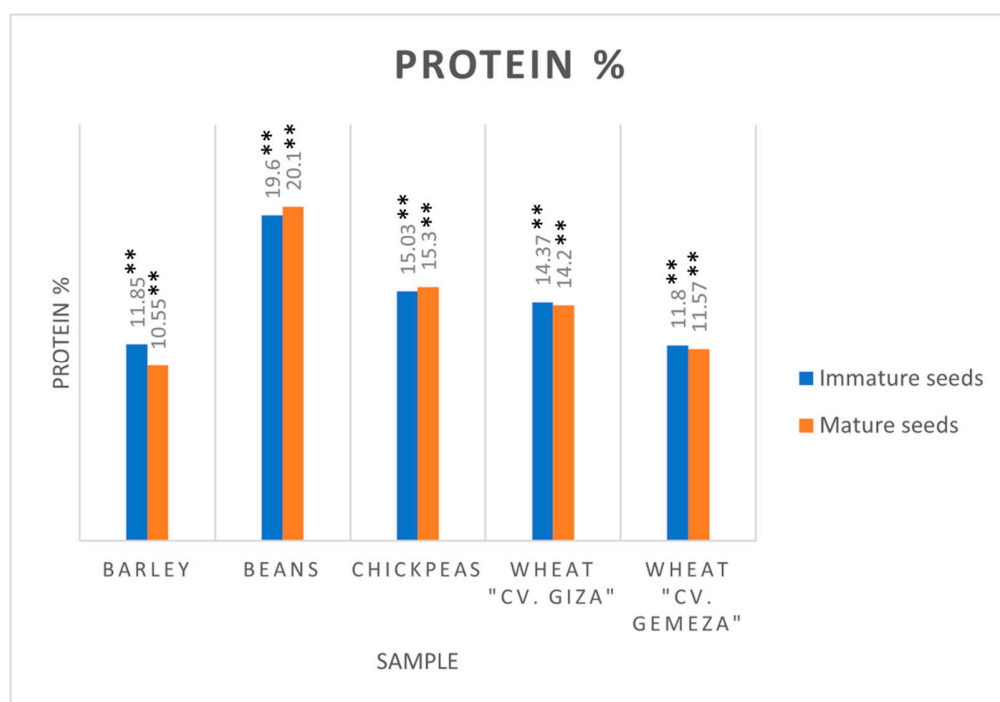

**Figure S5.** A bar graph showing diagrammatic values of the protein % (w/w) of both immature and mature seeds side by side. Each bar represents mean (n=3). \*\*Statistically non-significant ( $P$  value  $> 0.05$ , one-way ANOVA).

**Supplementary Table S1.** A summary of the total protein assay results, showing the nitrogen (%w/w) of each sample, as well as the protein (w/w) after factor conversion. All results are expressed as mean  $\pm$  SD, (n=3).

| Samples | N% (w/w)        | Protein% (w/w)      |
|---------|-----------------|---------------------|
| BIM     | 2.04 $\pm$ 0.32 | 11.85 $\pm$ 1.83 ** |
| BM      | 1.82 $\pm$ 0.16 | 10.55 $\pm$ 0.93 ** |
| BEIM    | 3.38 $\pm$ 0.66 | 19.6 $\pm$ 0.35 **  |
| BEM     | 3.47 $\pm$ 0.42 | 20.1 $\pm$ 2.43 **  |
| CIM     | 2.60 $\pm$ 0.13 | 15.03 $\pm$ 0.76 ** |
| CM      | 2.63 $\pm$ 0.04 | 15.3 $\pm$ 0.2 **   |
| W1IM    | 2.48 $\pm$ 0.09 | 14.37 $\pm$ 0.51 ** |
| W1M     | 2.45 $\pm$ 0.08 | 14.2 $\pm$ 0.5 **   |
| W2IM    | 2.04 $\pm$ 0.02 | 11.8 $\pm$ 0.1 **   |
| W2M     | 1.99 $\pm$ 0.03 | 11.57 $\pm$ 0.21 ** |

\*\*Statistically non-significant ( $P$  value  $> 0.05$ , one-way ANOVA).
